# Supplementary material for: Dendritic Cell Vaccination Enhances Immune Responses and Induces Regression of HER2pos DCIS Independent of Route: Results of Randomized Selection Design Trial
Source: Oxford University Press journal article supplement (doi:10.1158/1078-0432.ccr-16-1924), 2016-12-13
Supplement: 10780432ccr161924-sup-169497_1_supp_3719986_9f9zwd.docx [file 10780432ccr161924-sup-169497_1_supp_3719986_9f9zwd.docx]

**Supplemental Table 1**: Overall immune response detected in the peripheral blood by route of vaccine administration and ER status

| **ER status** | **Overall** | | | **Route of vaccine administration** | | | | | | | | |
| --- | --- | --- | --- | --- | --- | --- | --- | --- | --- | --- | --- | --- |
| **Intralesional** | | | **Intranodal** | | | **Intralesional and Intranodala** | | |
| **n** | **# immune**  **responder** | **%** | **n** | **# immune**  **responder** | **%** | **n** | **# immune**  **responder** | **%** | **n** | **# immune**  **responder** | **%** |
| ERneg | 24 | 20 | 83.3 | 8 | 6 | 75.0 | 11 | 10 | 90.9 | 5 | 4 | 80.0 |
| ERpos w/o AE | 8 | 7 | 87.5 | 4 | 4 | 100 | 1 | 1 | 100 | 3 | 2 | 66.7 |
| ERpos w AE | 21 | 16 | 76.2 | 7 | 6 | 85.7 | 7 | 6 | 85.7 | 7 | 4 | 57.1 |
| Total | 53 | 43 | 81.1 | 19 | 16 | 84.2 | 19 | 17 | 89.5 | 15 | 10 | 66.7 |

ER (estrogen receptor), AE (anti-estrogen)

a one patient (ERneg/ILN) not evaluable for overall CD4 peripheral blood immune response
