# Supplementary material for: Dendritic Cell Vaccination Enhances Immune Responses and Induces Regression of HER2pos DCIS Independent of Route: Results of Randomized Selection Design Trial
Source: Oxford University Press journal article supplement (doi:10.1158/1078-0432.ccr-16-1924), 2016-12-13
Supplement: 10780432ccr161924-sup-169497_1_supp_3719987_4f4zwd.docx [file 10780432ccr161924-sup-169497_1_supp_3719987_4f4zwd.docx]

**Supplemental Table 2:** Pathologic complete response rates by route of vaccine administration and ER status in 42 DCIS patients

| **ER Status** | **Overall** | | | **Route of vaccine administration** | | | | | | | | |
| --- | --- | --- | --- | --- | --- | --- | --- | --- | --- | --- | --- | --- |
| **Intralesional** | | | **Intranodal** | | | **Intralesional and Intranodal** | | |
| **n** | **# pCR** | **%** | **n** | **# pCR** | **%** | **n** | **# pCR** | **%** | **n** | **# pCR** | **%** |
| ERneg | 19 | 6 | 31.5 | 5 | 1 | 20.0 | 8 | 3 | 37.5 | 6 | 2 | 33.3 |
| ERpos w/o AE | 5 | 0 | 0.0 | 2 | 0 | 0.0 | 1 | 0 | 0.0 | 2 | 0 | 0.0 |
| ERpos w AE | 18 | 6 | 33.3 | 6 | 2 | 33.3 | 7 | 2 | 28.6 | 5 | 2 | 40.0 |
| Total | 42 | 12 | 28.6 | 13 | 3 | 23.1 | 16 | 5 | 31.3 | 13 | 4 | 30.8 |

ER (estrogen receptor), AE (anti-estrogen)
